# Supplementary material for: Early Emergence and Long-Term Persistence of HIV-Infected T-Cell Clones in Children
Source: PubMed Central journal article supplement (PMC8092253; doi:10.1128/mbio.00568-21), 2021-04-08
Supplement: mBio.00568-21-sf001.pdf [file mBio.00568-21-sf001.pdf]

**Figure S1. Number of Detections of Integration Sites.**

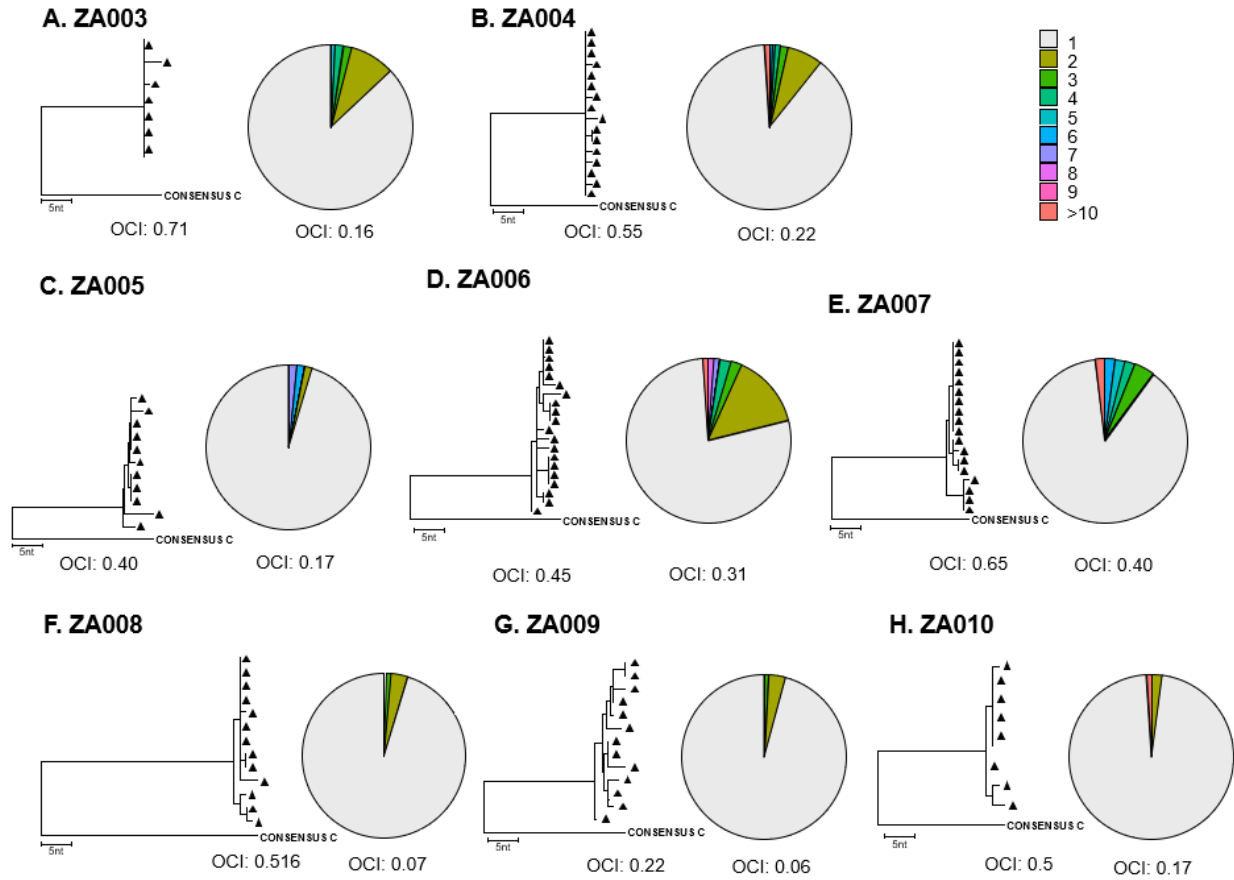

For each study participant, a neighbor-joining phylogenetic tree representing *gag-pol* single genome sequences with its respective OCI value is shown on the left; on the right, a pie chart representing the number of detections of integrations sites by ISA and the respective OCI value.
