# Supplementary material for: Early Emergence and Long-Term Persistence of HIV-Infected T-Cell Clones in Children
Source: PubMed Central journal article supplement (PMC8092253; doi:10.1128/mbio.00568-21), 2021-04-08
Supplement: mBio.00568-21-st001.pdf [file mBio.00568-21-st001.pdf]

**Table S1. Donor Characteristics.**

| PID                | Sex    | Time to viral load suppression in years | Pre-ART plasma HIV RNA <sup>a</sup> | ART regimen <sup>b</sup> | Years suppressed on ART | CD4% at on-ART time point |
|--------------------|--------|-----------------------------------------|-------------------------------------|--------------------------|-------------------------|---------------------------|
| ZA002              | Male   | 1.37                                    | 654000                              | AZT/3TC/LPV/r            | 6.87                    | 33                        |
| ZA003              | Male   | 0.46                                    | >750000                             | ABC/3TC/LPV/r            | 8.06                    | 21                        |
| ZA004 <sup>c</sup> | Male   | 1.38                                    | >750000                             | AZT/3TC/LPV/r            | 7.92/8.76               | 46                        |
| ZA005              | Male   | 0.47                                    | >750000                             | AZT/3TC/LPV/r            | 8.04                    | 41                        |
| ZA006              | Female | 0.44                                    | 635000                              | AZT/3TC/LPV/r            | 7.45                    | 50                        |
| ZA007              | Male   | 0.92                                    | >750000                             | AZT/3TC/EFV              | 8.24                    | 35                        |
| ZA008              | Female | 0.44                                    | >750000                             | AZT/3TC/LPV/r            | 6.77                    | 36                        |
| ZA009              | Female | 3.76                                    | >750000                             | AZT/3TC/EFV              | 9.13                    | 29                        |
| ZA010              | Female | 0.46                                    | 510000                              | AZT/3TC/LPV/r            | 8.35                    | 39                        |
| ZA011              | Female | 2.29                                    | >750000                             | AZT/3TC/LPV/r            | 7.35                    | 54                        |
| ZA012              | Male   | 0.93                                    | 277,000                             | AZT/3TC/LPV/r            | 8.41                    | 31                        |

<sup>a</sup>Determined by Roche Amplicor HIV Monitor assay v1.0

<sup>b</sup>ART abbreviations: Zidovudine (AZT), Lamivudine (3TC), Ritonavir-boosted Lopinavir (LPV/r), Efavirenz (EFV)

<sup>c</sup> Participant ZA004 had on-ART samples from two separate time-points, the first when the individual was suppressed for 7.92 years on ART and the second for 8.76 years.
