# Supplementary material for: Early Emergence and Long-Term Persistence of HIV-Infected T-Cell Clones in Children
Source: PubMed Central journal article supplement (PMC8092253; doi:10.1128/mbio.00568-21), 2021-04-08
Supplement: mBio.00568-21-st002.pdf [file mBio.00568-21-st002.pdf]

**Table S2. Orientation Bias for Genic Integrations Pre-ART<sup>a</sup>.**

| Chromosome   | Gene name <sup>b</sup> | Unique integrations with the gene (CHER) <sup>c</sup> | Unique integrations against the gene (CHER) <sup>c</sup> | Unique integrations with the gene ( <i>ex vivo</i> ) <sup>c</sup> | Unique integrations against the gene ( <i>ex vivo</i> ) <sup>c</sup> | Adjusted p-value <sup>d</sup> |
|--------------|------------------------|-------------------------------------------------------|----------------------------------------------------------|-------------------------------------------------------------------|----------------------------------------------------------------------|-------------------------------|
| <i>chr6</i>  | <i>BACH2</i>           | 26                                                    | 5                                                        | 60                                                                | 72                                                                   | 0.0019                        |
| <i>chr17</i> | <i>STAT5B</i>          | 24                                                    | 5                                                        | 284                                                               | 278                                                                  | 0.0078                        |
| <i>chr16</i> | <i>ANKRD11</i>         | 3                                                     | 16                                                       | 380                                                               | 403                                                                  | 0.0281                        |
| <i>chr22</i> | <i>HORMAD2</i>         | 11                                                    | 4                                                        | 192                                                               | 241                                                                  | 0.15                          |
| <i>chrX</i>  | <i>MECP2</i>           | 4                                                     | 12                                                       | 228                                                               | 267                                                                  | 0.45                          |
| <i>chr17</i> | <i>VMP1</i>            | 6                                                     | 12                                                       | 376                                                               | 374                                                                  | 0.52                          |
| <i>chr17</i> | <i>GRB2</i>            | 11                                                    | 5                                                        | 339                                                               | 336                                                                  | 0.52                          |
| <i>chr17</i> | <i>NPLOC4</i>          | 5                                                     | 10                                                       | 418                                                               | 408                                                                  | 0.52                          |
| <i>chr17</i> | <i>POLR2A</i>          | 6                                                     | 10                                                       | 161                                                               | 177                                                                  | 0.82                          |
| <i>chr11</i> | <i>MALAT1</i>          | 6                                                     | 9                                                        | 113                                                               | 96                                                                   | 0.82                          |
| <i>chr11</i> | <i>PACSI</i>           | 18                                                    | 21                                                       | 852                                                               | 821                                                                  | 0.84                          |
| <i>chr11</i> | <i>KDM2A</i>           | 9                                                     | 10                                                       | 806                                                               | 724                                                                  | 0.84                          |
| <i>chr19</i> | <i>CARD8</i>           | 10                                                    | 7                                                        | 331                                                               | 315                                                                  | 0.84                          |
| <i>chr19</i> | <i>VAV1</i>            | 7                                                     | 8                                                        | 255                                                               | 222                                                                  | 0.84                          |
| <i>chr17</i> | <i>RPTOR</i>           | 14                                                    | 12                                                       | 820                                                               | 807                                                                  | 0.89                          |
| <i>chr17</i> | <i>CYTH1</i>           | 10                                                    | 9                                                        | 352                                                               | 363                                                                  | 0.89                          |
| <i>chr22</i> | <i>TNRC6B</i>          | 9                                                     | 10                                                       | 444                                                               | 435                                                                  | 0.89                          |
| <i>chr1</i>  | <i>ASH1L</i>           | 8                                                     | 9                                                        | 378                                                               | 385                                                                  | >0.99                         |

<sup>a</sup> Data shown only for integrations into genes for which at least 15 unique integrations were detected

<sup>b</sup> Genic coordinates mapped to hg19

<sup>c</sup> “With” gene and “Against” gene defined as orientation of integrated provirus compared with the sense of the host gene it’s integrated into

<sup>d</sup> Adjusted p-value determined by Fisher Test with post-hoc Benjamini-Hochberg Correction
