# Supplementary material for: Early Emergence and Long-Term Persistence of HIV-Infected T-Cell Clones in Children
Source: PubMed Central journal article supplement (PMC8092253; doi:10.1128/mbio.00568-21), 2021-04-08
Supplement: mBio.00568-21-st003.pdf [file mBio.00568-21-st003.pdf]

**Table S3. Orientation Bias for Genic Integrations On-ART<sup>a</sup>.**

| Chromosome   | Gene name <sup>b</sup> | Unique integrations with the gene (CHER) <sup>c</sup> | Unique integrations against the gene (CHER) <sup>c</sup> | Unique integrations with the gene ( <i>ex vivo</i> ) <sup>c</sup> | Unique integrations against the gene ( <i>ex vivo</i> ) <sup>c</sup> | p-value <sup>d</sup> |
|--------------|------------------------|-------------------------------------------------------|----------------------------------------------------------|-------------------------------------------------------------------|----------------------------------------------------------------------|----------------------|
| <i>chr17</i> | <i>STAT5B</i>          | 31                                                    | 6                                                        | 284                                                               | 278                                                                  | 6.2E-05              |
| <i>chr6</i>  | <i>BACH2</i>           | 12                                                    | 4                                                        | 60                                                                | 72                                                                   | 0.034                |

<sup>a</sup> Data shown only for integrations into genes for which at least 15 unique integrations were detected in vivo and at least 1 unique integration ex vivo

<sup>b</sup> Genic coordinates mapped to hg19

<sup>c</sup> “With” gene and “Against” gene defined as orientation of integrated provirus compared with the sense of the host gene it’s integrated into

<sup>d</sup> p-Value determined by Fisher Test – no post-hoc adjustments performed
